# Supplementary material for: The KDM3A–KLF2–IRF4 axis maintains myeloma cell survival
Source: PubMed Central journal article supplement (PMC4728406; doi:10.1038/ncomms10258), 2016-01-05
Supplement: ncomms10258-s1.pdf [file ncomms10258-s1.pdf]

## Supplementary Information

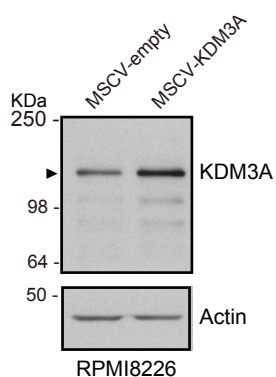

### Supplementary Figure 1 | Overexpression of *KDM3A* in RPMI8226 cells.

Protein level of KDM3A in RPMI8226 cells expressing the *KDM3A* cDNA. RPMI8226 cells were transduced with either the *KDM3A* cDNA or empty vector by retrovirus. Whole cell lysates were subjected to immunoblot analysis with KDM3A and Actin antibodies. Data are representative of at least three independent experiments.

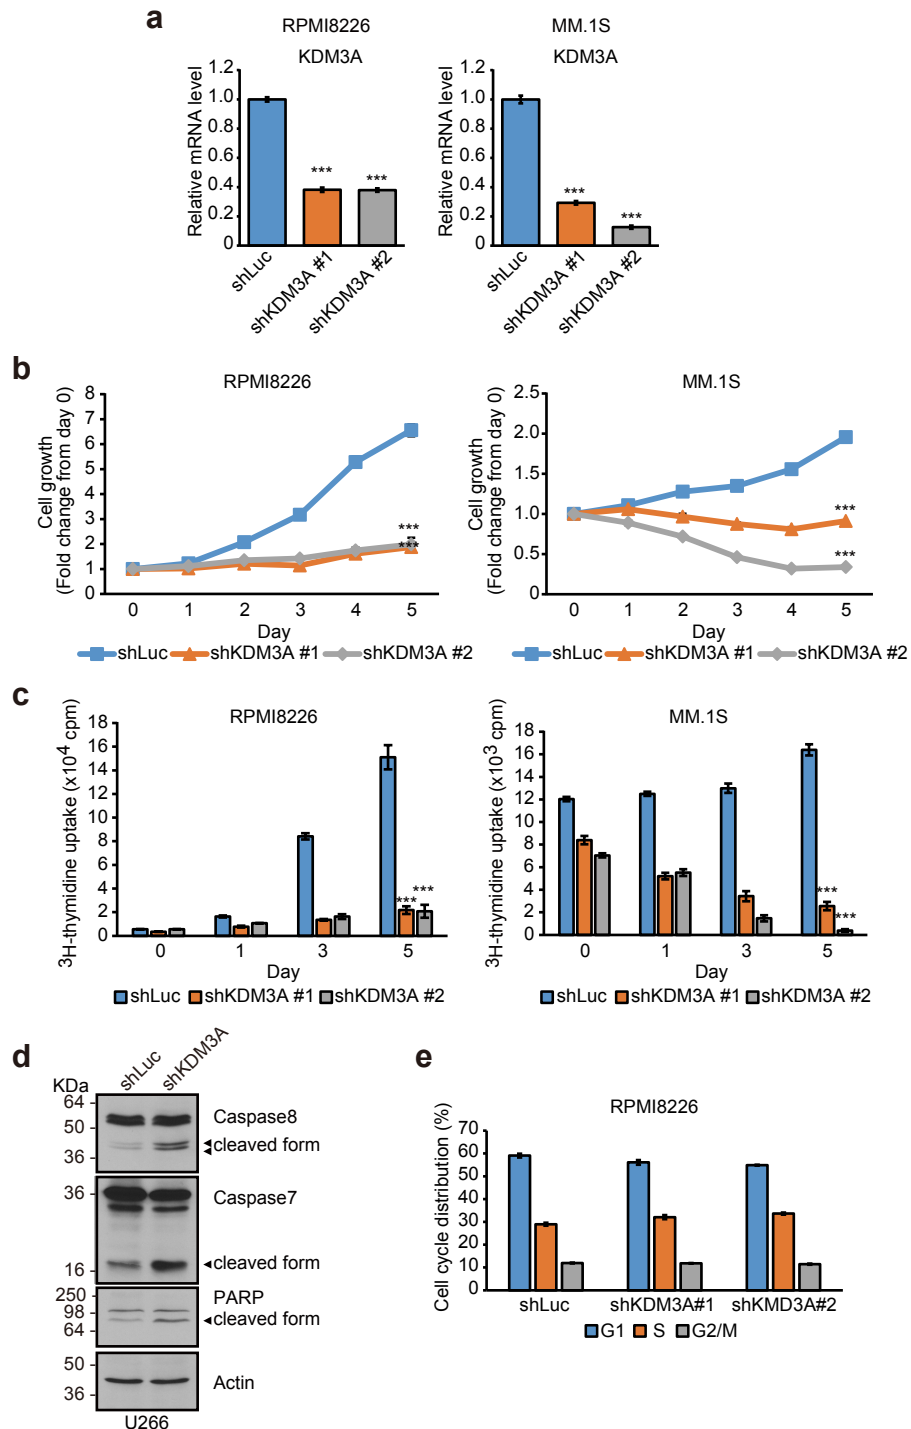

**Supplementary Figure 2 | Knockdown of *KDM3A* in MM cells.** (a) Quantification of *KDM3A* mRNA levels in RPMI8226 and MM.1S cells transduced with either *KDM3A*-specific shRNA (shKDM3A #1 and #2) or control shRNA targeting

*luciferase* (shLuc) by lentivirus. Values represent the amount of mRNA relative to shLuc, which is arbitrarily defined as 1. Data represent mean  $\pm$  s.d. of triplicate measurements. **(b,c)** Significant reduction of cell growth and DNA synthesis after silencing of *KDM3A* in MM cells. RPMI8226 or MM.1S cells were transduced with either shKDM3A or shLuc. Three days post-infection, which was designated as day 0, viable cells were counted by trypan blue exclusion and plated in 96-well plates. Cells were cultured for indicated intervals from day 0, and analyzed for growth by MTT assay **(b)** or analyzed for DNA synthesis using  $^3\text{H}$ -thymidine uptake **(c)**. Cell growth is shown as fold change compared to day 0 **(b)**. Data represent mean  $\pm$  s.d. of quintuplicate cultures. **(d)** Immunoblot analysis of caspase 8, caspase 7, and PARP in whole cell lysates from *KDM3A*-knockdown U266 cells. Arrowheads indicate cleaved form. **(e)** Cell cycle distribution in *KDM3A*-knockdown RPMI8226 cells. RPMI8226 cells transduced with either shKDM3A or shLuc (4 days post-infection) were analyzed for cell cycle distribution by staining with propidium iodide using a flow cytometer. Data represent mean  $\pm$  s.d. of duplicate measurements. For **(a-e)**, data are representative of at least two independent experiments. \*\*\* $P < 0.001$  compared with control; Student's *t*-test.

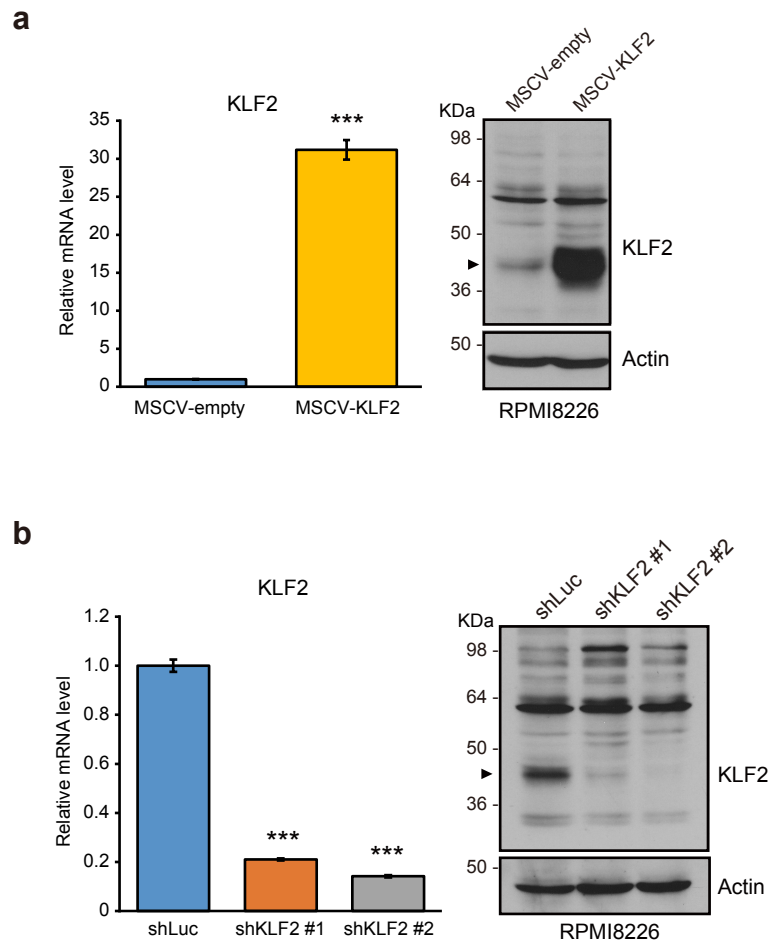

**Supplementary Figure 3 | Overexpression and knockdown of *KLF2* in RPMI8226 cells.** (a) Quantification of *KLF2* mRNA and protein levels in RPMI8226 cells expressing the *KLF2* cDNA. RPMI8226 cells were transduced with either the *KLF2* cDNA or empty vector by retrovirus. Cells were harvested for isolation of total RNA or whole cell lysates, and subjected to quantitative real time PCR or immunoblot analysis with *KLF2* and Actin antibodies. (b) Quantification of *KLF2* mRNA and protein levels in RPMI8226 cells transduced with either *KLF2*-specific shRNA (shKLF2 #1 and #2) or control shRNA targeting *luciferase* (shLuc) by lentivirus. For (a,b), data represent mean  $\pm$  s.d. of triplicate measurements (left panel), and are representative of at least two independent experiments.

\*\*\* $P < 0.001$  compared with control; Student's *t*-test.

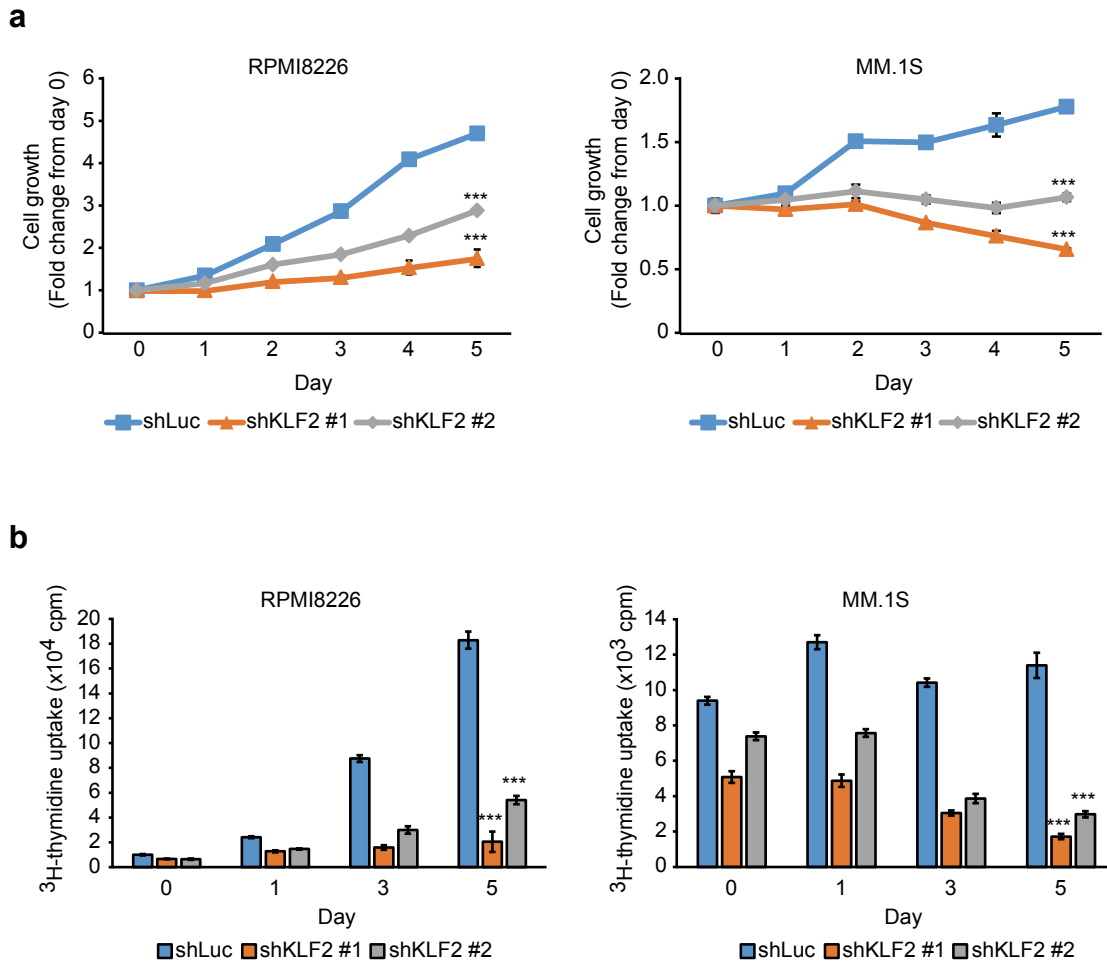

**Supplementary Figure 4 | Knockdown of *KLF2* significantly reduces cell growth and DNA synthesis in MM cells.** (a,b) RPMI8226 or MM.1S cells were transduced with either *KLF2*-specific shRNA (shKLF2 #1 and #2) or control shRNA (shLuc) by lentivirus. Cells were cultured for indicated intervals from day 0 (three days post-infection), and analyzed for growth by MTT assay (a) or analyzed for DNA synthesis using <sup>3</sup>H-thymidine uptake (b). Cell growth is shown as fold change compared to day 0 (a). Data represent mean ± s.d. of quintuplicate cultures, and are representative of two independent experiments. \*\*\**P* < 0.001 compared with control; Student's *t*-test.

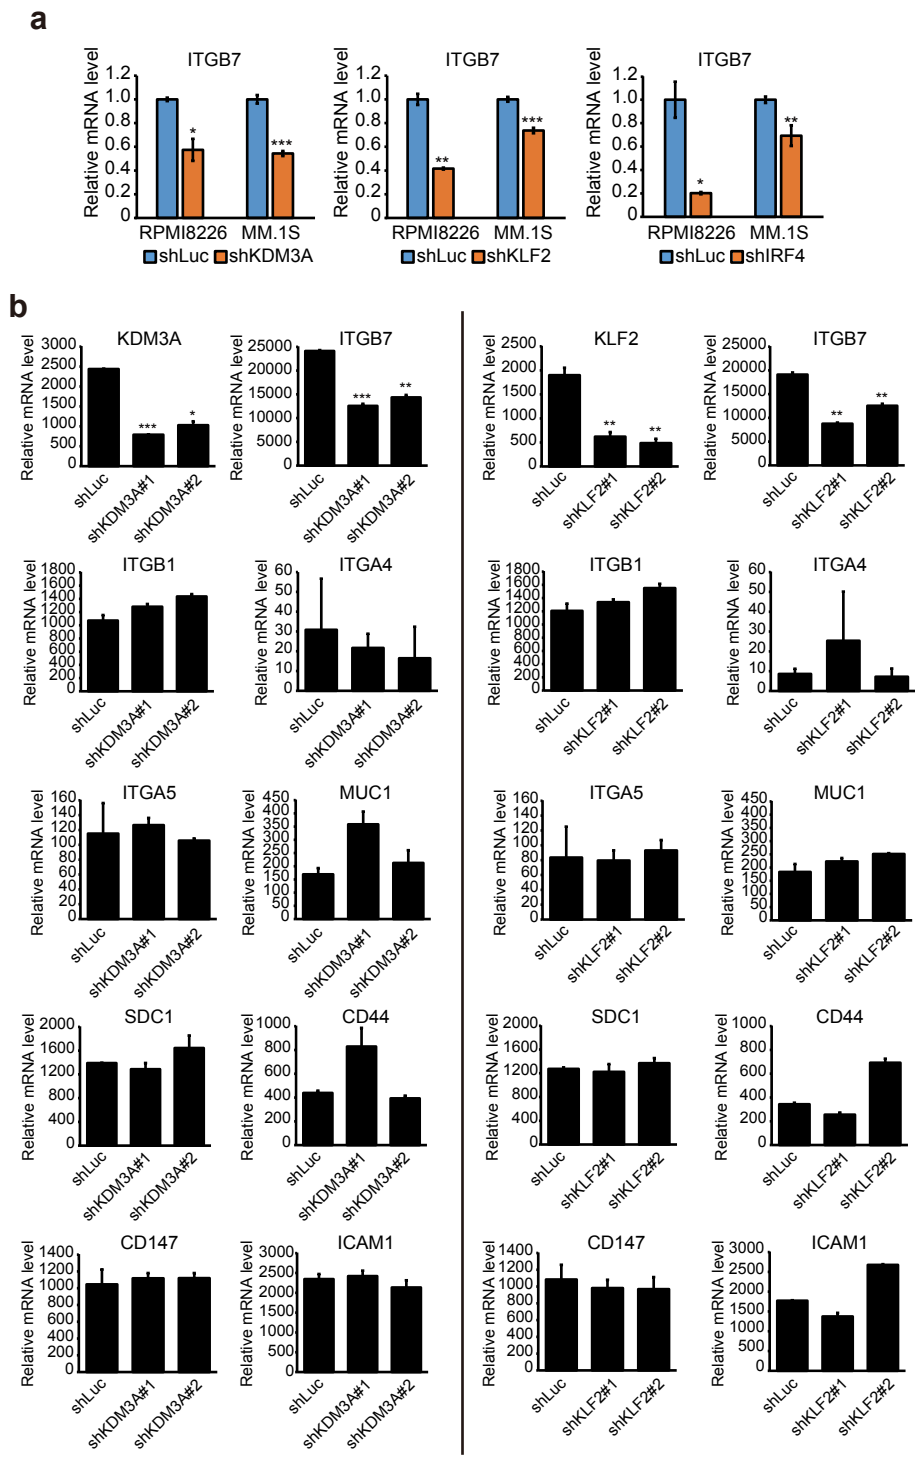

**Supplementary Figure 5 | Expression of *ITGB7* and other adhesion molecules after knockdown of *KDM3A* or *KLF2*. (a) Quantification of *ITGB7* mRNA levels in RPMI8226 and MM.1S cells transduced with either shRNA against *KDM3A***

(shKDM3A), *KLF2* (shKLF2), *IRF4* (shIRF4), or control shRNA (shLuc). Cells were harvested for isolation of total RNA and subjected to quantitative real time PCR. Data represent mean  $\pm$  s.d. of triplicate measurements. **(b)** Microarray data in RPMI8226 cells transduced with shKDM3A, shKLF2, or control shLuc were analyzed for mRNA expression of *ITGB7*, *ITGB1*, *ITGA4*, *ITGA5*, *MUC1*, *SDC1*, *CD44*, *CD147* and *ICAM1*. Left panel; shKDM3A dataset, right panel; shKLF2 dataset. Data represent mean  $\pm$  s.d. of duplicate experiments. \* $P < 0.05$ , \*\* $P < 0.01$ , \*\*\* $P < 0.001$  compared with control; Student's *t*-test.

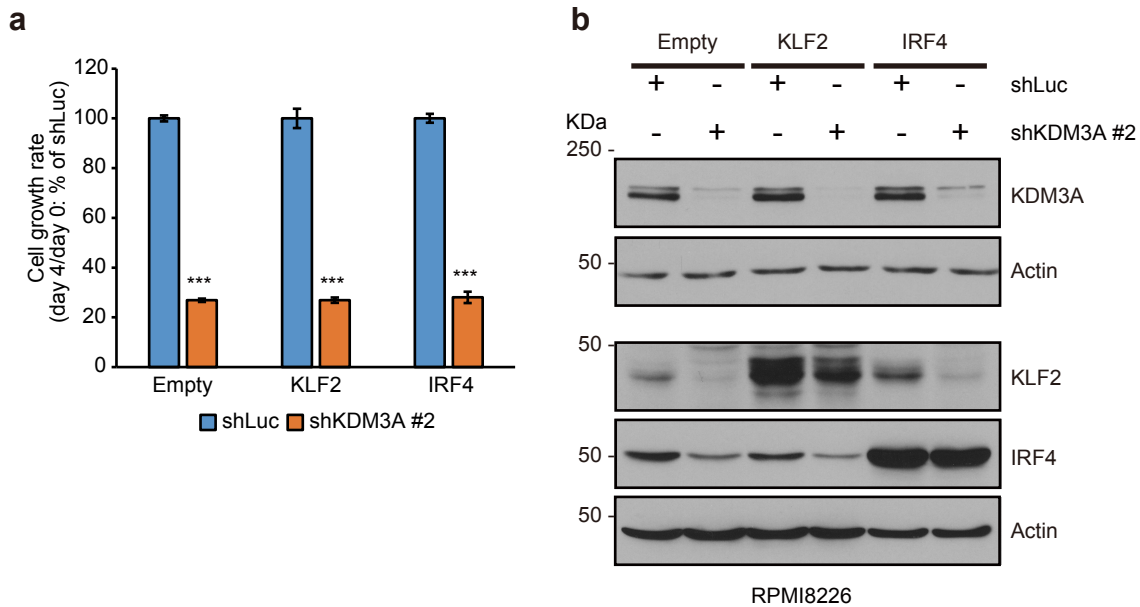

**Supplementary Figure 6 | Knockdown of *KDM3A* in *KLF2* or *IRF4*-overexpressed RPMI8226 cells.** (a) RPMI8226 cells were retrovirally transduced with the *KLF2* or *IRF4* cDNA, or empty vector. Cells expressing the *KLF2* or *IRF4* cDNA, or empty vector were then lentivirally transduced with shKDM3A or shLuc. Cell growth rate (day 4/day 0) after lentiviral infection was determined for shKDM3A relative to shLuc. The growth rate for control shLuc in each cells expressing the *KLF2* or *IRF4* cDNA, or empty vector is set as 100%, respectively. Data represent mean  $\pm$  s.d. of quintuplicate cultures. \*\*\* $P < 0.001$  compared with control; Student's *t*-test. (b) Immunoblot analysis of KDM3A, KLF2, or IRF4 after knockdown of *KDM3A* in *KLF2* or *IRF4*-overexpressed RPMI8226 cells. Actin served as the loading control for each membrane. For (a,b), data are representative of two experiments.



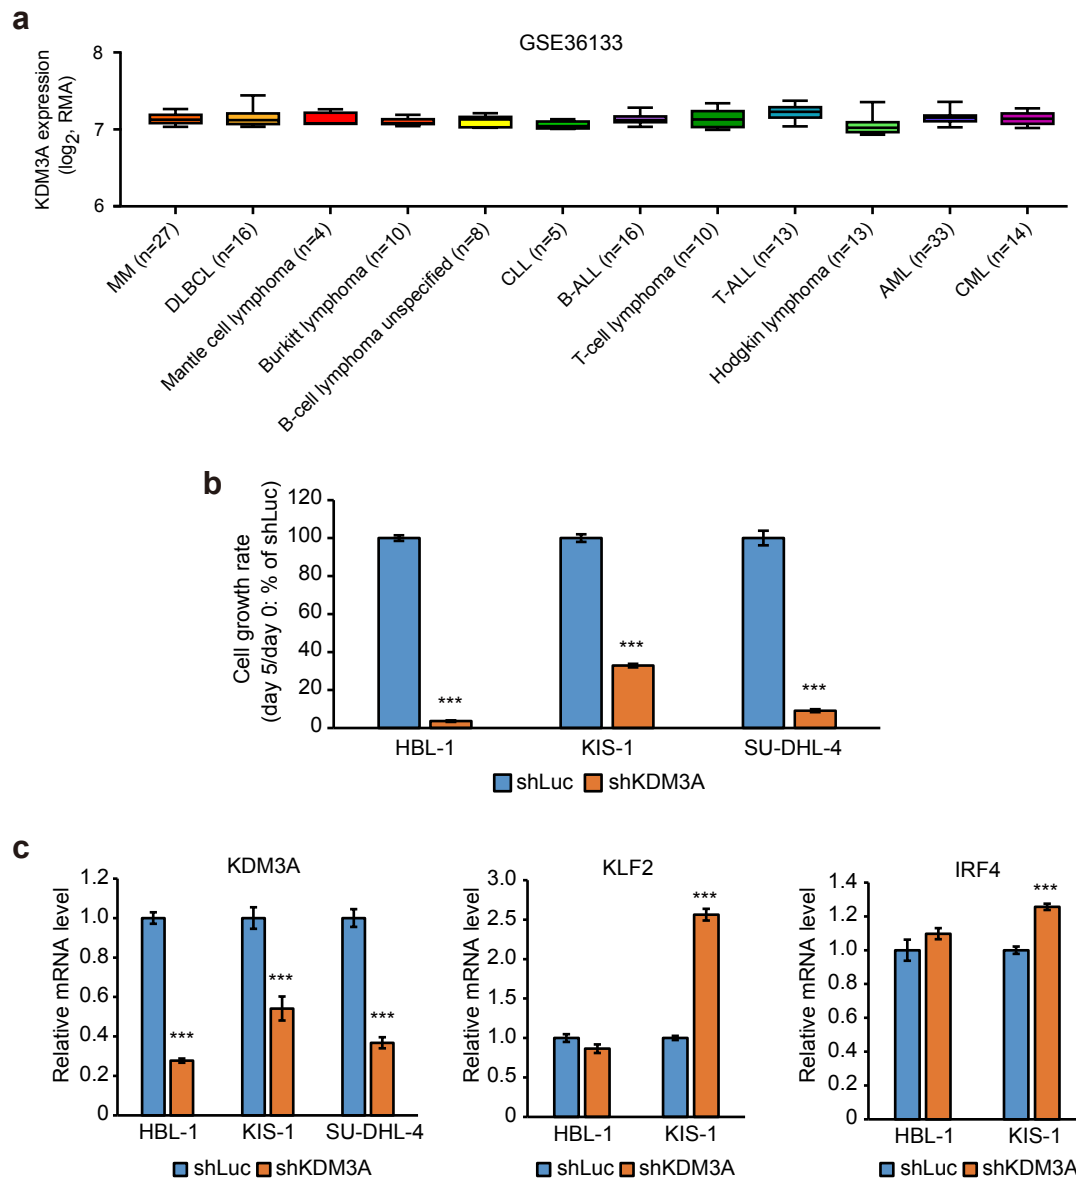

**Supplementary Figure 7 | Knockdown of *KDM3A* in DLBCL cell lines.** (a) Microarray data set (GSE36133) was analyzed for mRNA expression of *KDM3A* in hematologic cancer cell lines. MM; multiple myeloma, DLBCL; diffuse large B cell lymphoma, CLL; chronic lymphocytic leukemia, B-ALL; B-cell acute lymphoblastic leukemia, T-ALL; T-cell acute lymphoblastic leukemia, AML; acute myelogenous leukemia, CML; chronic myelogenous leukemia. (b) Effect of *KDM3A* knockdown on DLBCL cell growth. DLBCL cell lines (HBL-1, KIS-1, and SU-DHL-4) were

transduced with shKDM3A or control shLuc. Three days post-infection (after 2 days of puromycin selection), which was designated as day 0, cells were plated in 96-well plates. Cell viability was measured on day 0 and day 5 by MTT assay, and cell growth rate (day 5/day 0) relative to shLuc was determined. Data represent mean  $\pm$  s.d. of quintuplicate cultures. \*\*\* $P < 0.001$  compared with control; Student's  $t$ -test.

(c) Quantitative real time PCR of *KDM3A*, *KLF2* and *IRF4* in HBL-1, KIS-1, and SU-DHL-4 cells transduced with either shKDM3A or shLuc. After 3 days of infection, cells were harvested for isolation of total RNA. Values represent the amount of mRNA relative to control shLuc sample, defined as 1. *KLF2* and *IRF4* expression of SU-DHL4 is not shown because *KLF2* and *IRF4* expression is almost undetectable in this cell line. Error bars represent s.d. of triplicate measurements. For (b,c), data are representative of two experiments. \*\*\* $P < 0.001$  compared with control; Student's  $t$ -test.

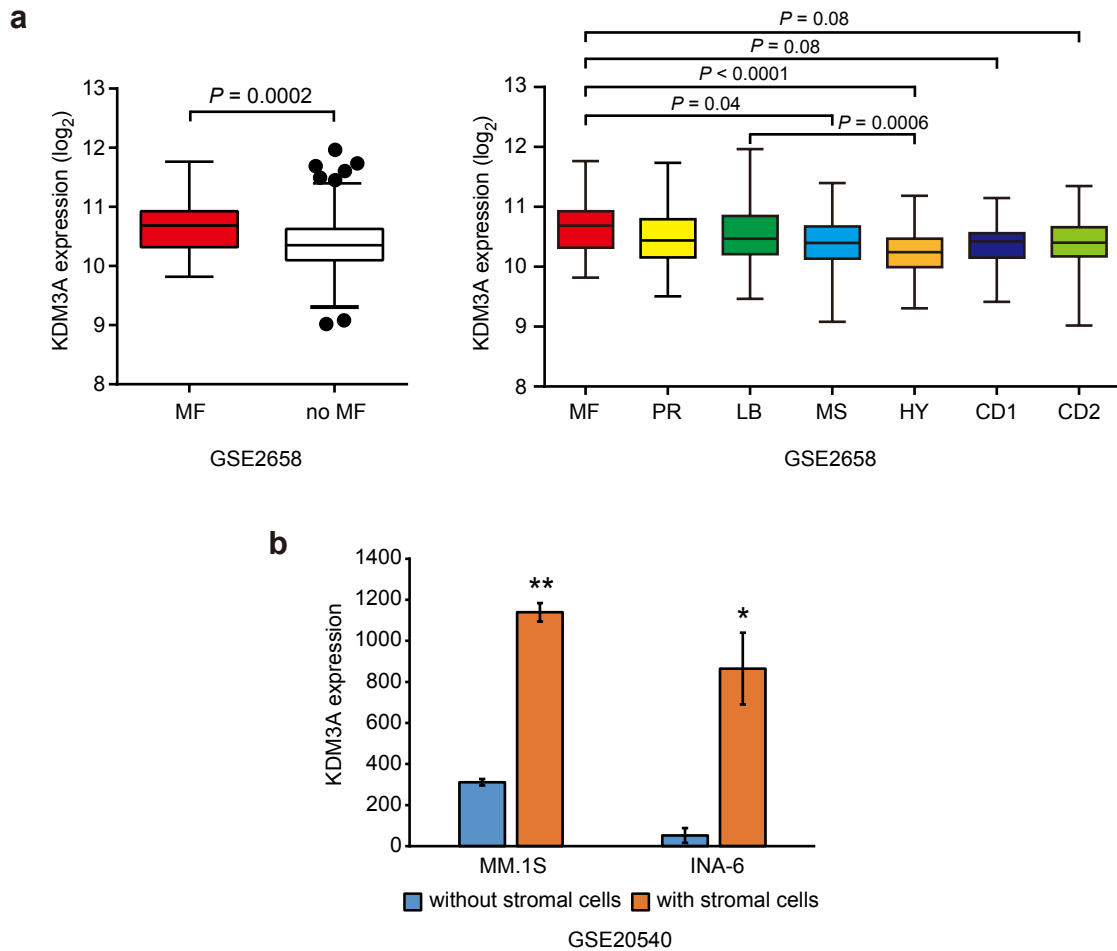

**Supplementary Figure 8 | *KDM3A* expression in MM cells.** (a) *KDM3A* expression is elevated in MM patient samples related to *MAF* translocations and high *MAF* expression. Microarray data set (GSE2658) was analyzed for mRNA expression of *KDM3A* in newly diagnosed MM patient samples. MF, PR, LB, MS, HY, CD1, and CD2 are the molecular classified subgroups defined by Zhan et al.<sup>1</sup>. MF is the subgroup associated with *MAF* translocations and high *MAF* expression. *P* values were determined by Student's *t*-test (left panel), or ANOVA followed by Tukey's test (right panel). (b) *KDM3A* expression in MM.1S and INA-6 cells cultured alone or with HS-5 bone marrow stromal cells. Publicly available microarray data set (GSE20540) was analyzed for mRNA expression of *KDM3A* in MM cells. Data represent mean  $\pm$  s.d. of duplicate measurements. \**P* < 0.05, \*\**P* < 0.01 compared with control; Student's *t*-test.

**Fig. 1b**

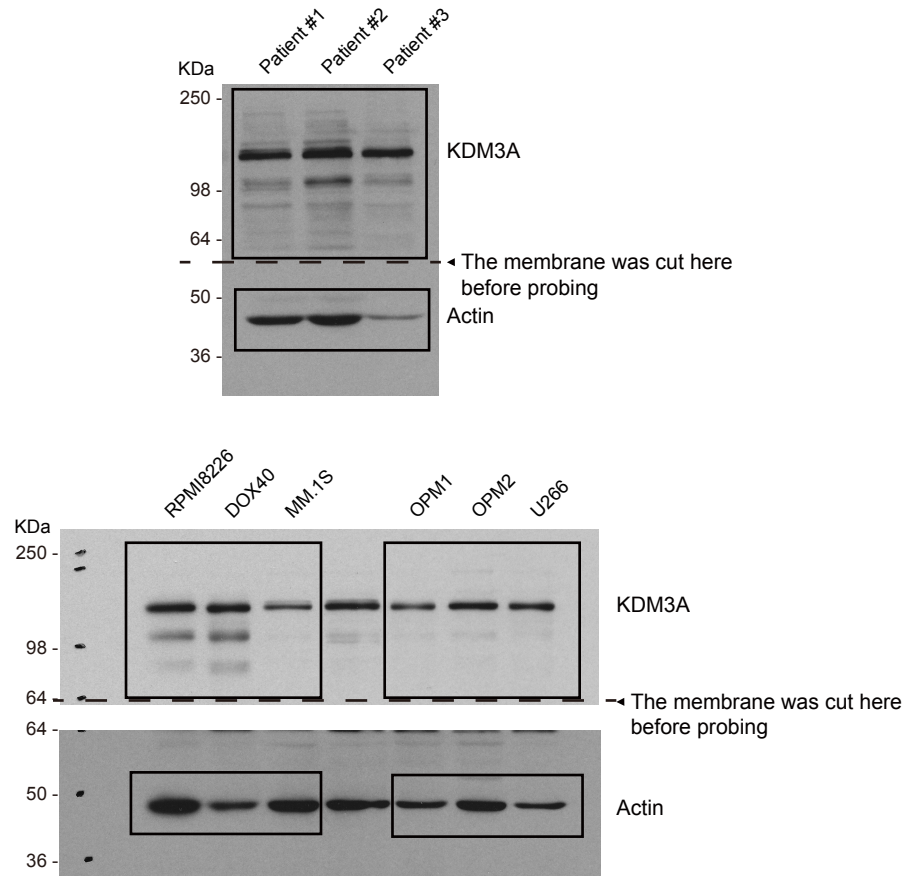

**Supplementary Figure 9 | Original images of immunoblot analyses.**

**Fig. 2**

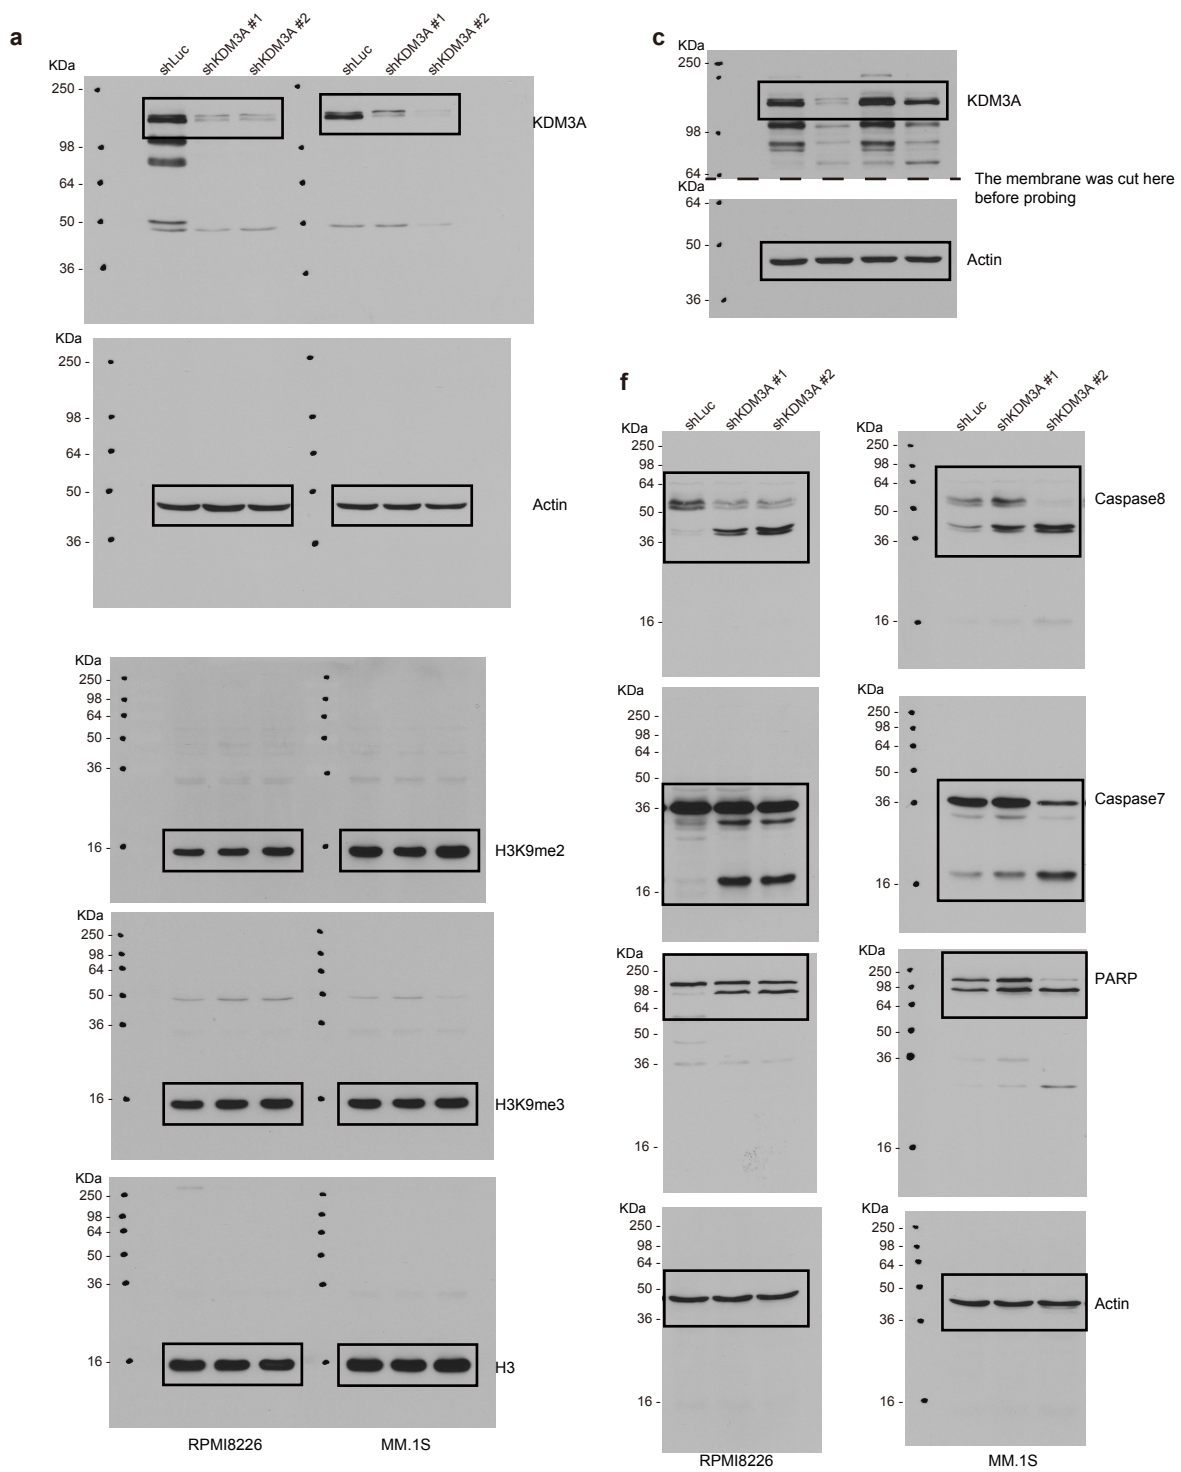

**Supplementary Figure 9 | Original images of immunoblot analyses.**

**Fig. 3**

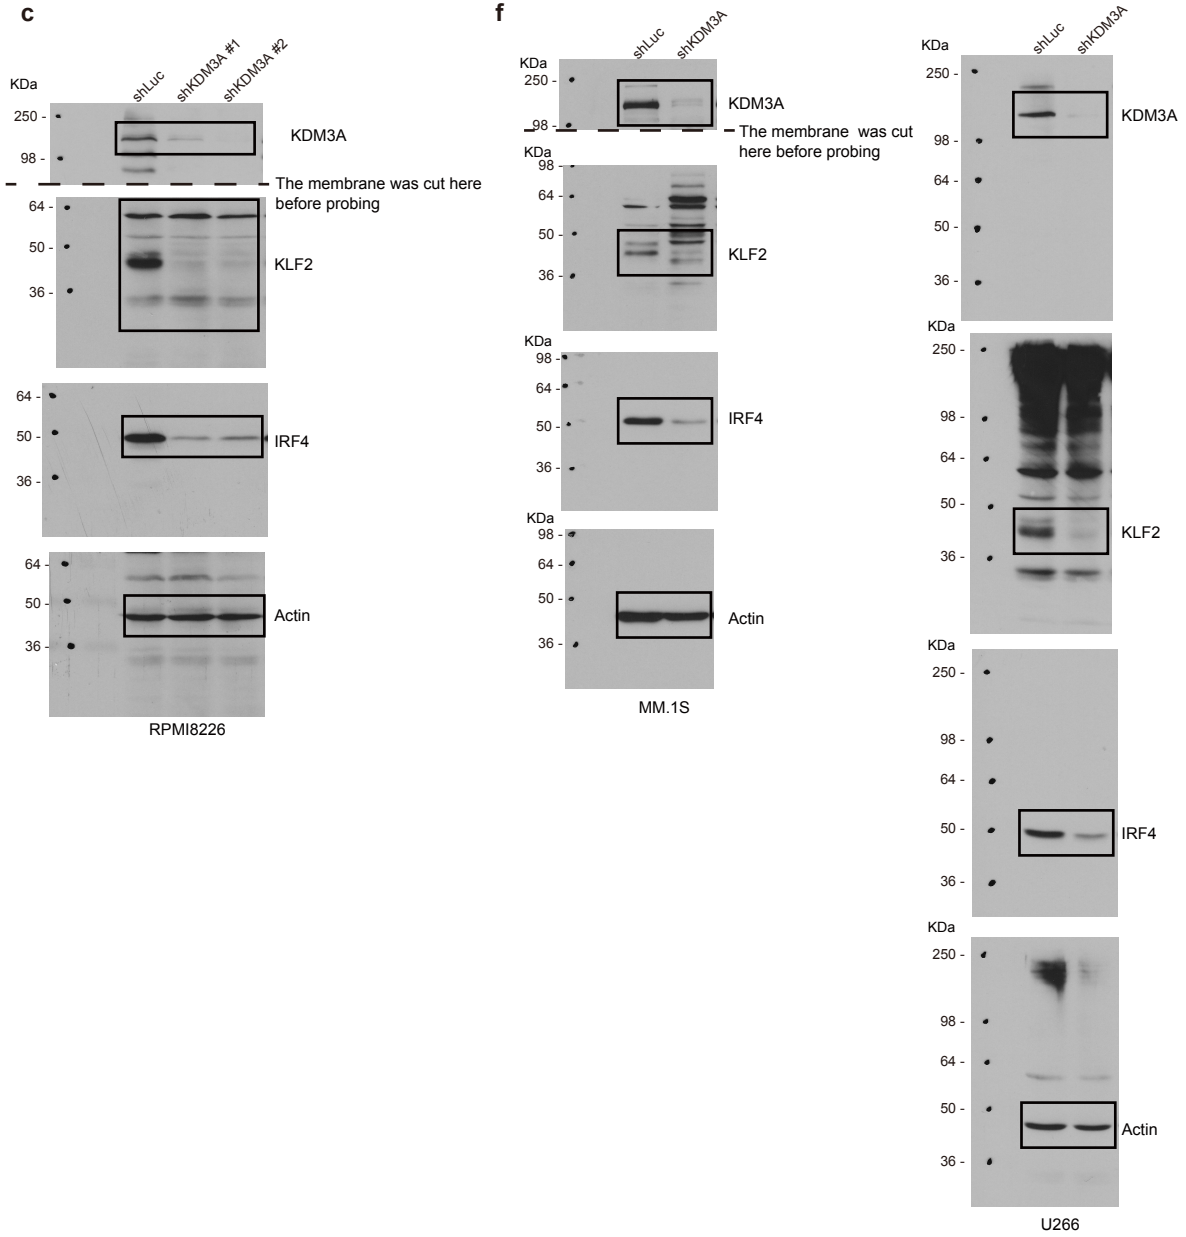

**Supplementary Figure 9 | Original images of immunoblot analyses.**

**Fig. 4**

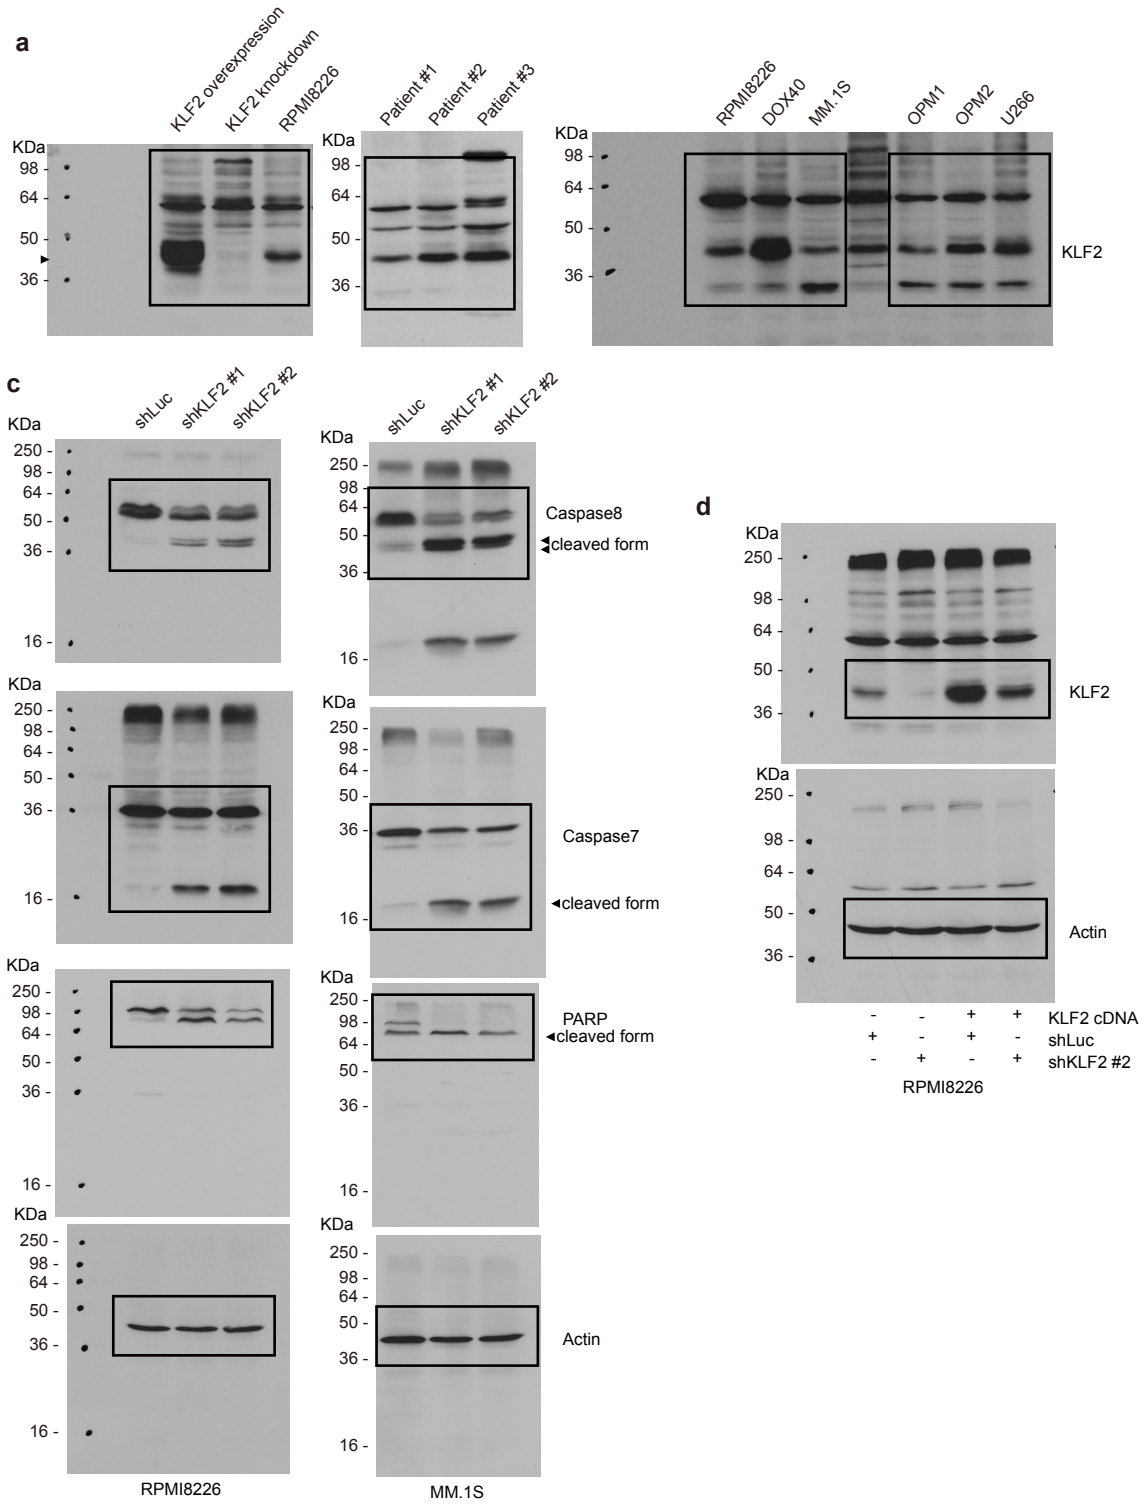

**Supplementary Figure 9 | Original images of immunoblot analyses.**

**Fig. 5**

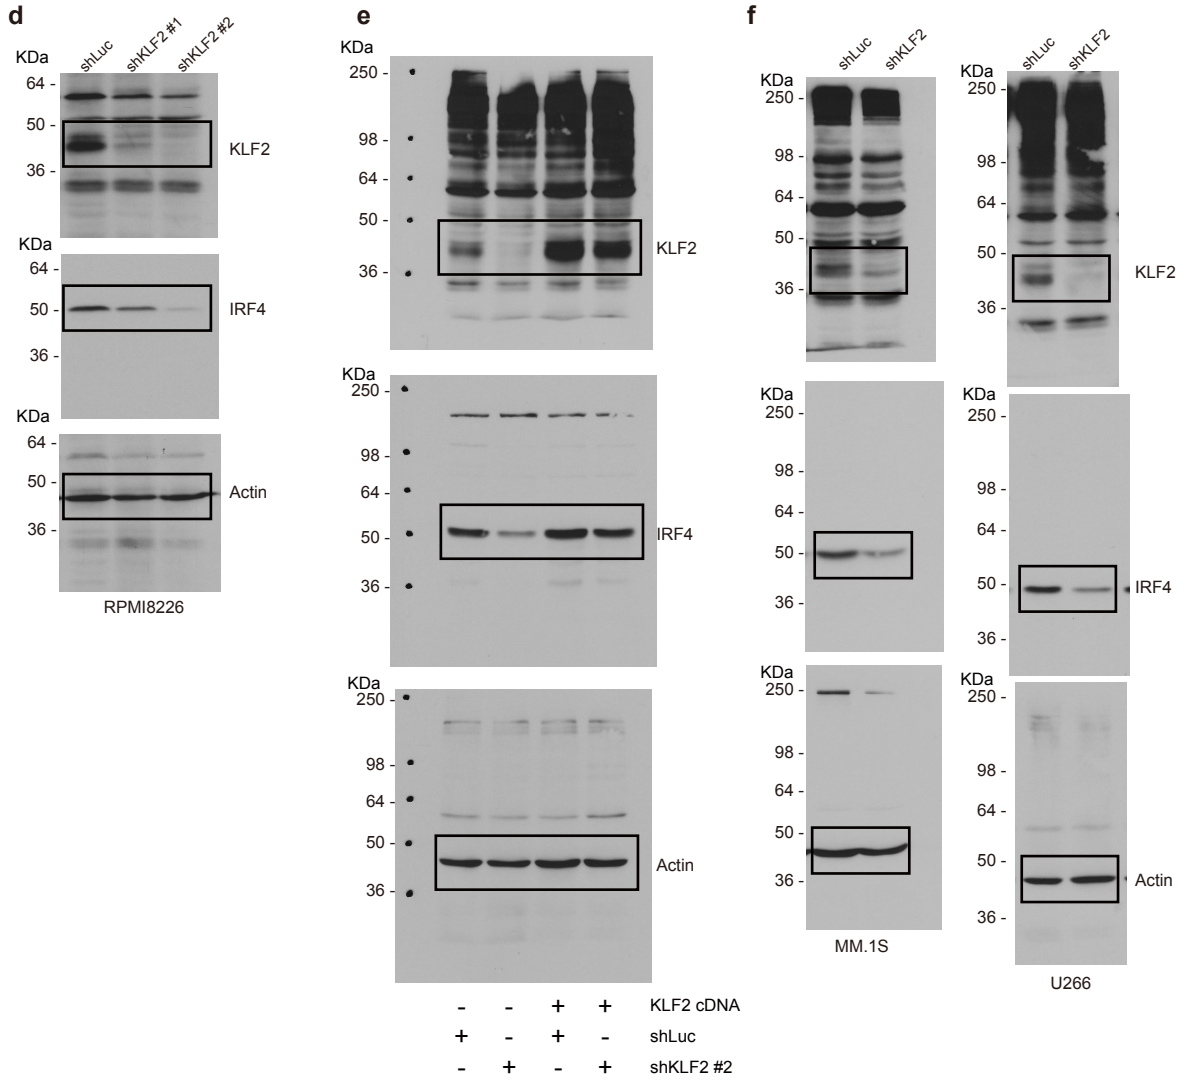

**Supplementary Figure 9 | Original images of immunoblot analyses.**



**Fig. 6**

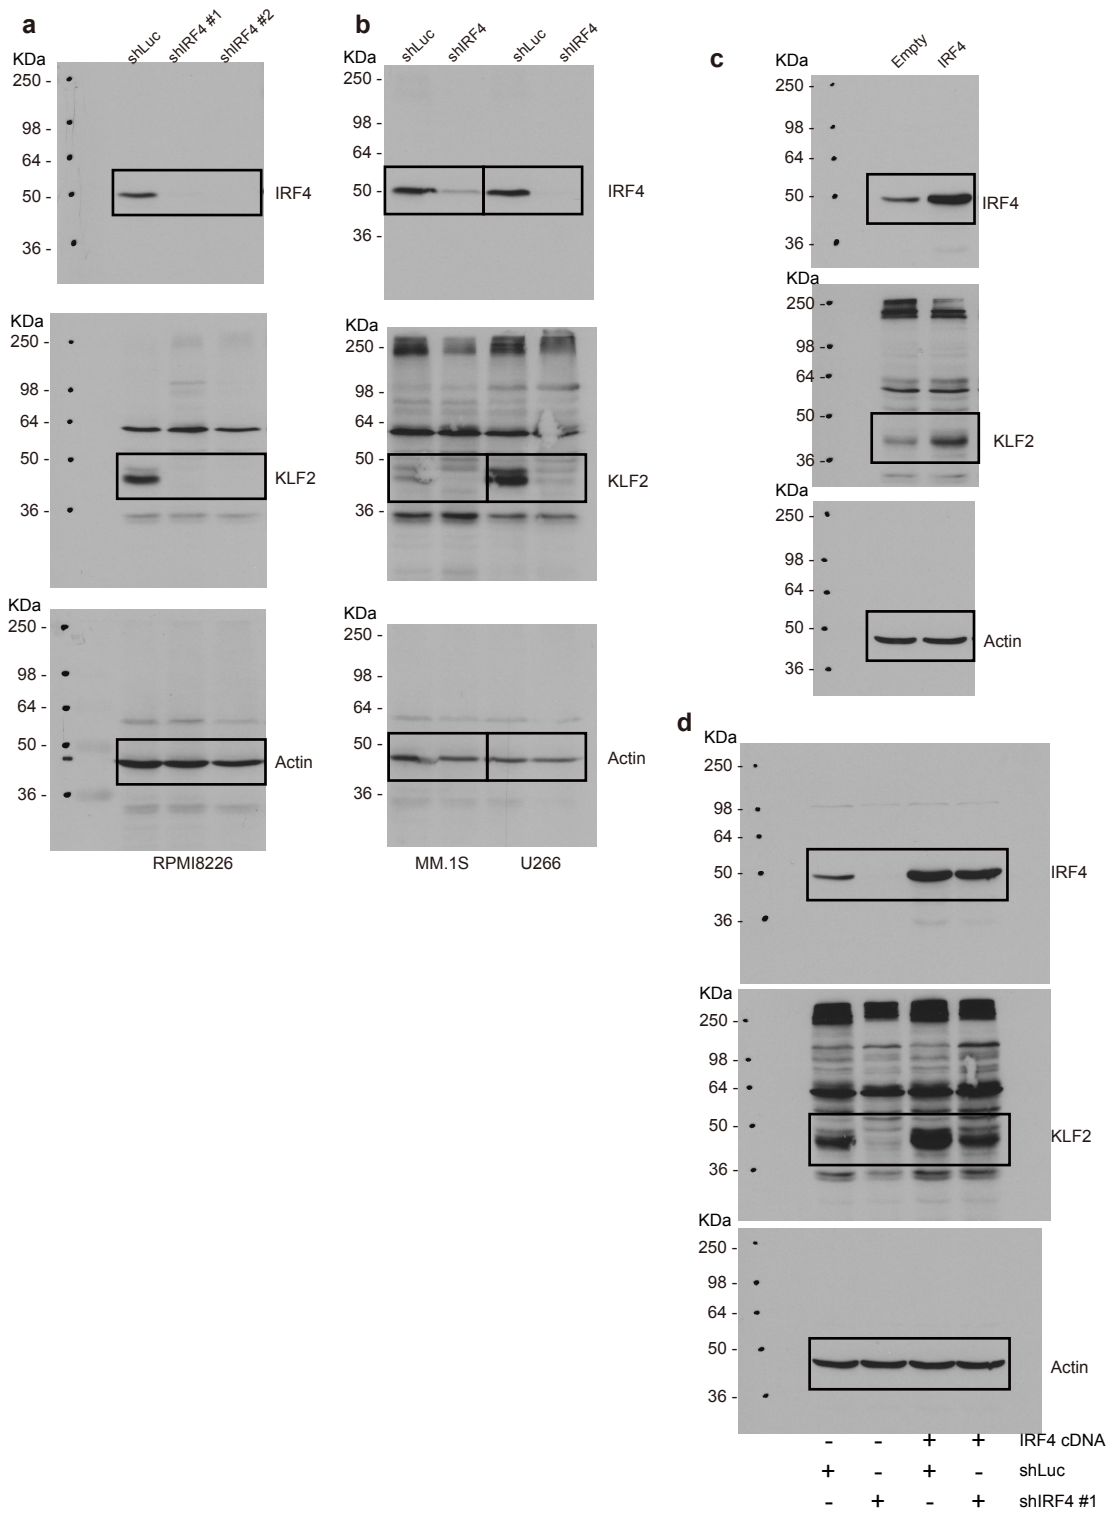

**Supplementary Figure 9 | Original images of immunoblot analyses.**

**Fig. 7**

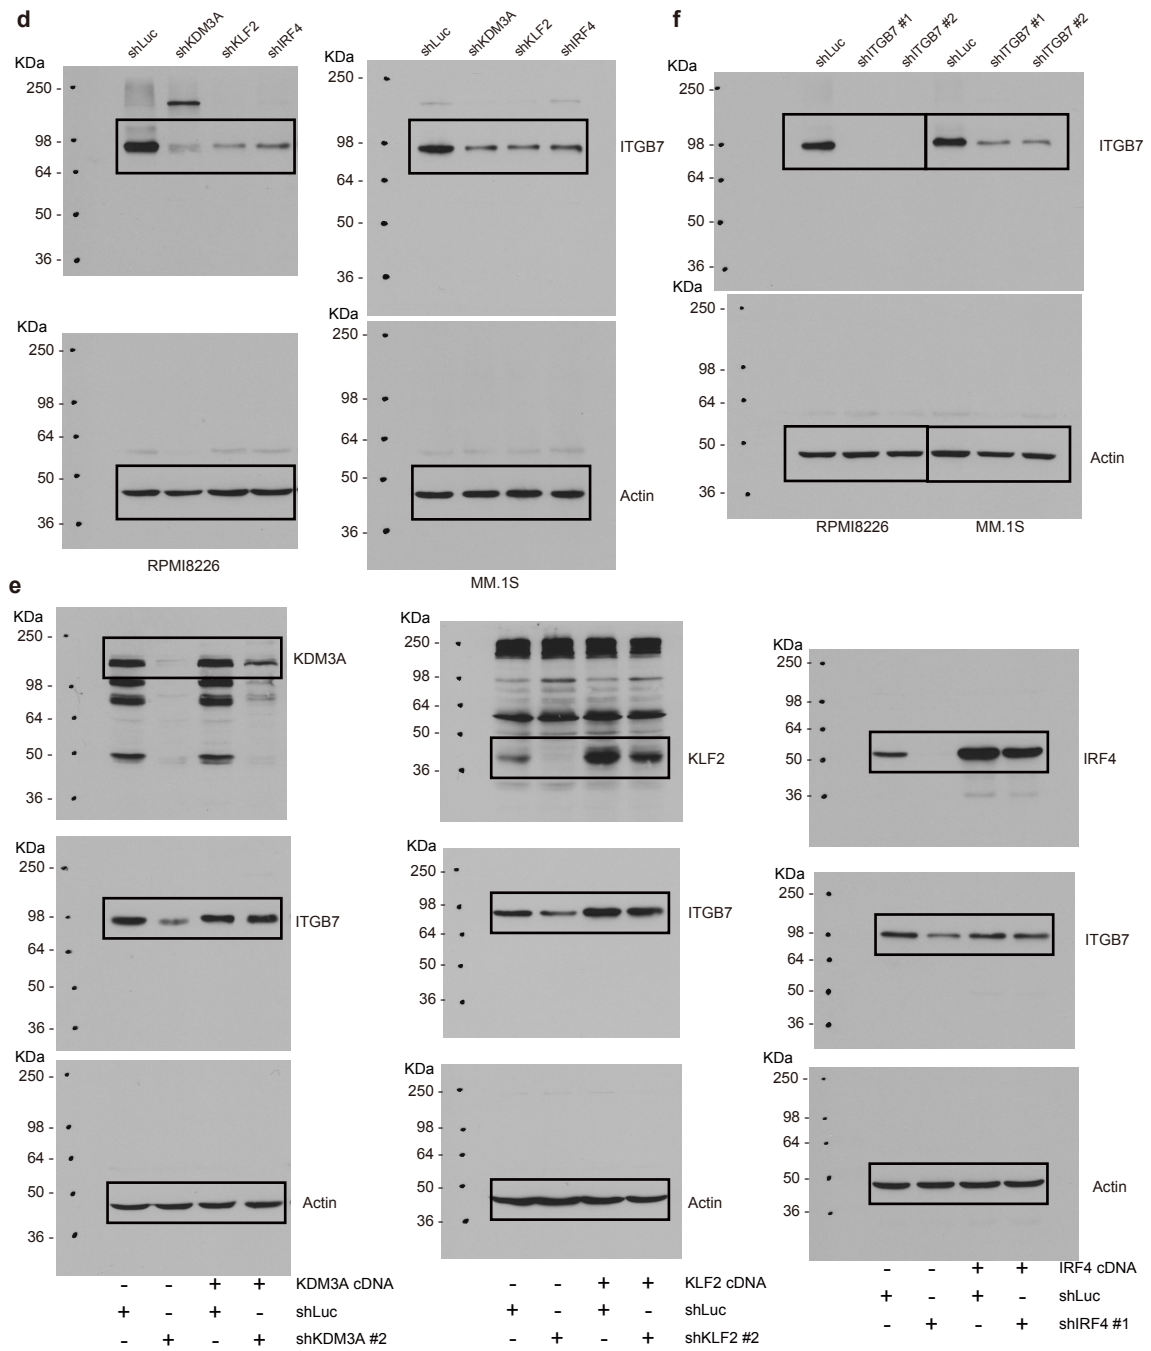

**Supplementary Figure 9 | Original images of immunoblot analyses.**

**Supplementary Fig. 1**

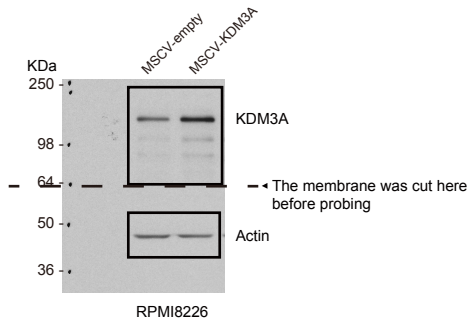

**Supplementary Fig. 3**

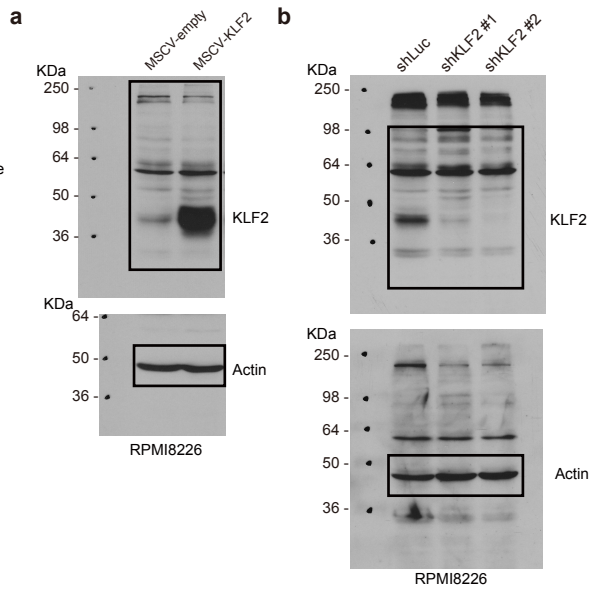

**Supplementary Fig. 2d**

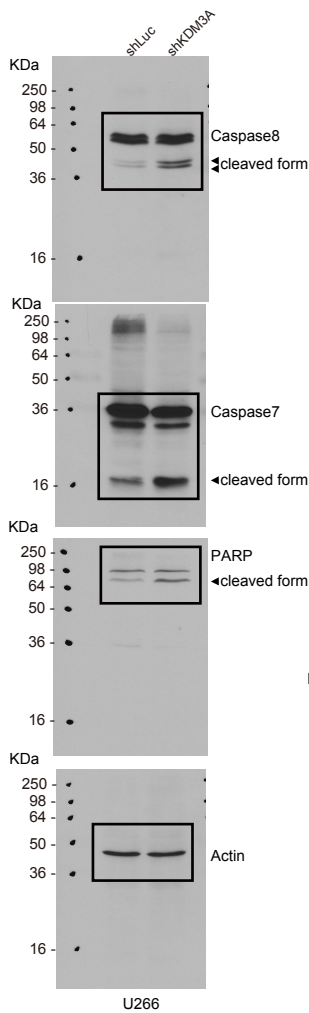

**Supplementary Fig. 6b**

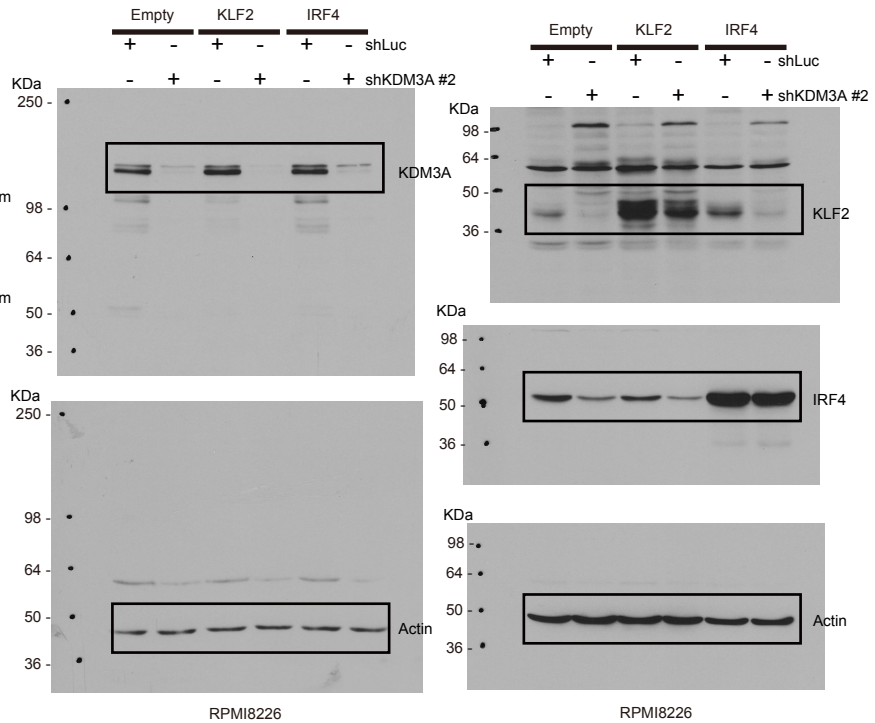

**Supplementary Figure 9 | Original images of immunoblot analyses.**

**Supplementary Table 1. List of antibodies**

| <b>Antibodies</b> | <b>Sources</b>         | <b>Catalog #</b> | <b>Applications (dilution or concentration)</b>                 |
|-------------------|------------------------|------------------|-----------------------------------------------------------------|
| KDM3A             | Novus Biologicals      | NB100-77282      | WB (1:4000), ChIP (8 $\mu\text{g ml}^{-1}$ )                    |
| KLF2              | Provided by Dr. Minami | N2212            | WB (1 $\mu\text{g ml}^{-1}$ ), ChIP (20 $\mu\text{g ml}^{-1}$ ) |
| IRF4              | Cell Signaling         | 4964             | WB (1:1000)                                                     |
| IRF4              | Santa Cruz             | sc-6059          | ChIP (20 $\mu\text{g ml}^{-1}$ )                                |
| ITGB7             | Sigma                  | HPA042277        | WB (1:8000)                                                     |
| Actin             | Santa Cruz             | sc-8432          | WB (1:250)                                                      |
| H3K9me1           | Abcam                  | ab9045           | ChIP (16 $\mu\text{g ml}^{-1}$ )                                |
| H3K9me2           | Millipore              | 07-441           | WB (1:1000)                                                     |
| H3K9me2           | Abcam                  | ab1220           | ChIP (16 $\mu\text{g ml}^{-1}$ )                                |
| H3K9me3           | Millipore              | 07-523           | WB (1:1000)                                                     |
| H3K9me3           | Abcam                  | ab8898           | ChIP (16 $\mu\text{g ml}^{-1}$ )                                |
| H3                | Cell Signaling         | 4499             | WB (1:8000)                                                     |
| Caspase 7         | Cell Signaling         | 9492             | WB (1:1000)                                                     |
| Caspase 8         | Cell Signaling         | 9746             | WB (1:1000)                                                     |
| PARP              | Cell Signaling         | 9542             | WB (1:4000)                                                     |
| normal rabbit IgG | Santa Cruz             | sc-2027          | ChIP (control)                                                  |
| normal mouse IgG  | Santa Cruz             | sc-2025          | ChIP (control)                                                  |
| normal goat IgG   | Santa Cruz             | sc-2028          | ChIP (control)                                                  |
| rabbit IgG-HRP    | Cell Signaling         | 7074             | WB (2nd Ab) (1:2000)                                            |
| mouse IgG-HRP     | Cell Signaling         | 7076             | WB (2nd Ab) (1:2000)                                            |
| Apo2.7-PE         | Beckmann Coulter       | PN IM2088U       | Flow cytometry (10 $\mu\text{l}$ per sample)                    |
| IgG1(mouse)-PE    | Beckmann Coulter       | PN IM0670U       | Flow cytometry (control)                                        |

WB; western blot, ChIP; chromatin immunoprecipitation

**Supplementary Table 2. List of shRNA vectors**

| <b>Target Genes</b> | <b>Vectors</b>  | <b>Clone IDs</b> | <b>Target Sequences</b> |
|---------------------|-----------------|------------------|-------------------------|
| <i>KDM3A</i>        | shKDM3A #1      | TRCN0000021151   | GCTGGTATTTAGACCGATCAT   |
|                     | shKDM3A #2      | TRCN0000021152   | GCTTTGATTGTGAAGCATTTA   |
| <i>KLF2</i>         | shKLF2 #1       | TRCN0000020725   | AGTTCGCATCTGAAGGCGCAT   |
|                     | shKLF2 #2       | TRCN0000020728   | CGGCACCGACGACGACCTCAA   |
| <i>IRF4</i>         | shIRF4 #1       | TRCN0000014763   | GCCCAAATTCTCCTCTCTAAA   |
|                     | shIRF4 #2       | TRCN0000014764   | GCCATTCCTCTATTCAAGAAT   |
| <i>ITGB7</i>        | shITGB7 #1      | TRCN0000057718   | GCACAGAGTTTGACTACCCTT   |
|                     | shITGB7 #2      | TRCN0000057721   | GCTGAGTAAACTGATTCCTAA   |
| <i>Luc</i>          | shLuc (control) | TRCN0000072246   | CAAATCACAGAATCGTCGTAT   |
| <i>RFP</i>          | shRFP (control) | TRCN0000072203   | CGCGTGATGAACTTCGAGGAC   |

**Supplementary Table 3. List of primers for cloning**

| <b>Genes</b>                | <b>Primers</b>            | <b>Sequences (5' to 3')</b>             |
|-----------------------------|---------------------------|-----------------------------------------|
| <i>KDM3A</i>                | Forward                   | GGAGCTCTTCCTGCAGGCGTGGAAACCATG          |
|                             | Reverse<br>(+ XhoI site)  | CCGCTCGAGGCTGCCTGTAATTCATTCCAA<br>TGTGC |
| <i>KLF2</i>                 | Forward                   | GGCCATGGCGCTGAGTGAACCCATCCTG            |
|                             | Reverse                   | GTCCCGGCTACATGTGCCGTTTCATGTG            |
| <i>IRF4</i>                 | Forward<br>(+ EcoRI site) | GGAATTCATGAACCTGGAGGGCGGCGGCC<br>GAG    |
|                             | Reverse<br>(+ XhoI site)  | CCGCTCGAGATTGTGTCACTGCACTCCAGC<br>CTGG  |
| <b><i>IRF4</i> promoter</b> | <b>Primers</b>            | <b>Sequences (5' to 3')</b>             |
| <i>IRF4</i> -1200           | Forward<br>(+ XhoI site)  | CCGCTCGAGTAATTTTGCGATTAAGGACATC<br>TTGG |
| <i>IRF4</i> -520            | Forward<br>(+ XhoI site)  | CCGCTCGAGGGTTCCCGGTGATGGCCTTGC<br>CGA   |
| <i>IRF4</i> -480            | Forward<br>(+ XhoI site)  | CCGCTCGAGTCCACCTCCAGTTCTCTTTGG<br>ACCA  |
| <i>IRF4</i> -160            | Forward<br>(+ XhoI site)  | CCGCTCGAGCCAGCCTTCACGCCGGCCCTG<br>AGGCT |
| <i>IRF4</i> +14             | Reverse                   | GAGAGTGCGAGGTGGGAAAGAGGAACT             |

**Supplementary Table 4. List of primers for mutagenesis**

| <b>Genes</b>                | <b>Primers</b> | <b>Sequences (5' to 3')</b>                         |
|-----------------------------|----------------|-----------------------------------------------------|
| <i>KDM3A</i>                | Forward        | TAAAGAATTTCAAGCTCTCATCGTAAAACA<br>CTTAGATGAAAGCCATC |
|                             | Reverse        | GATGGCTTTCATCTAAGTGTTTACGATGAG<br>AGCTTGAAATTCCTTA  |
| <i>KLF2</i>                 | Forward        | CCGAGTCCGGCGGCACGGATGATGATTTG<br>AACAGCGTGCTGGACT   |
|                             | Reverse        | AGTCCAGCACGCTGTTCAAATCATCATCCG<br>TGCCGCCGGACTCGG   |
| <b><i>IRF4 promoter</i></b> | <b>Primers</b> | <b>Sequences (5' to 3')</b>                         |
| <i>IRF4 -181</i>            | Forward        | CCAAGGGCGCGGGAACCAGATCTCGGCCG<br>CGGCAGCCCC         |
|                             | Reverse        | GGGGGCTGCCGCGGCCGAGATCTGGTCCC<br>GCGCCCTTGG         |
| <i>IRF4 -496</i>            | Forward        | CCCGGTGATGGCCTTGCCGAGATCTCTCCC<br>GCAACCTCCACCTC    |
|                             | Reverse        | GAGGTGGAGGTTGCGGGAGAGATCTCGGC<br>AAGGCCATCACCGGG    |

Underlined bases represent the specific mutations

**Supplementary Table 5. List of primers for realtime PCR**

| <b>Target Genes</b>  | <b>Primers</b> | <b>Sequences (5' to 3')</b> |
|----------------------|----------------|-----------------------------|
| <i>KDM3A</i>         | Forward        | CCGCAAGGATAAGGAGCAAC        |
|                      | Reverse        | CCTTCTACCCGCAACACACC        |
| <i>KLF2</i>          | Forward        | CCAAGAGTTCGCATCTGAAGG       |
|                      | Reverse        | CGTGTGCTTTCGGTAGTGG         |
| <i>IRF4</i>          | Forward        | AACAACTGGAGAGAGACCAGACC     |
|                      | Reverse        | CCTCTCAAAGCATAGAGTCACC      |
| <i>ITGB7</i>         | Forward        | CCAGCAACGTGGTACAGCTC        |
|                      | Reverse        | TCAGCCTTACCCTCCCTCTTC       |
| <i>Cyclophilin A</i> | Forward        | TGGTTCCCAGTTTTTCATCTGC      |
|                      | Reverse        | CCATGGCCTCCACAATATTCA       |

**Supplementary Table 6. List of primers for ChIP-PCR**

| Target Regions                    | Primers | Sequences (5' to 3')        |
|-----------------------------------|---------|-----------------------------|
| <i>KLF2</i> near TSS              | Forward | GCGCTGAGTGAACCCATCCTG       |
| (+88 bp relative to TSS)          | Reverse | CCGCAGCCCACGTTCTACTAC       |
| <i>IRF4</i>                       | Forward | GCATTCGCACCTCGCCCTTCG       |
| (-138 bp relative to TSS)         | Reverse | CTCAGGGCCGGCGTGAAGGCT       |
| <i>MYOD1</i>                      | Forward | GCAGTGTTCTATTGGCCTCG        |
| (-39 bp relative to TSS)          | Reverse | GGCTTCCTCACCCCTAGCTTCT      |
| <i>GAPDH</i>                      | Forward | CACCATTAGGGACCTTCTTGCCT     |
| (-1.3 kb relative to TSS)         | Reverse | TTCTGGGATTGCCTTTCCTGCT      |
| <i>KLF2</i> second intron 1       | Forward | GGAGGTTGGGAAGAGCACTTAGA     |
| (+1.5 kb relative to TSS)         | Reverse | ACTTCCTGAGACGCAGCATCTC      |
| <i>KLF2</i> second intron 2       | Forward | GAGATGCTGCGTCTCAGGAAGT      |
| (+1.6 kb relative to TSS)         | Reverse | CTGAGGGATCCTTGCCCTACAT      |
| <i>KLF2</i> -2.8 kb               | Forward | GTACGTTAGTTAAGGGAGGTTGAA    |
| (-2.8 kb relative to TSS)         | Reverse | CTGAGGTACCTCTCTGCCTTCC      |
| <i>KLF2</i> -2.1 kb               | Forward | GGCATCCCATATCCTTGAGGAG      |
| (-2.1 kb relative to TSS)         | Reverse | GCTATTGTGAGTTCACACAGGCTCT   |
| <i>KLF2</i> -1.6 kb               | Forward | CCACATGGTCCCCAATGACTT       |
| (-1.6 kb relative to TSS)         | Reverse | GGGATTACAGGTGTGAGCCATTG     |
| <i>SUB1</i> promoter <sup>2</sup> | Forward | AGGCACACTGCCAGGTTCCCTCAGTGA |
|                                   | Reverse | ATCTGCAACCCTTCTGCTTTAACAAGT |

TSS; transcriptional start site



## Supplementary References

1. Zhan, F. *et al.* The molecular classification of multiple myeloma. *Blood* **108**, 2020-2028 (2006).
2. Shaffer, A.L. *et al.* IRF4 addiction in multiple myeloma. *Nature* **454**, 226-231 (2008).
